# Supplementary material
Source: publisher figshare collection journal article supplement (https://sage.figshare.com/ndownloader/files/15279338)
Supplement: Supplementary file 1 [file 15279338]

## **SUPPLEMENTAL MATERIAL**

### **Antibiotic Treatment for Pneumonia Complicating Stroke: Recommendations From The Pneumonia in Stroke Consensus (PISCES) Group**

Amit K Kishore<sup>1,2</sup> MRCP, Adam R Jeans<sup>3</sup> MD, Javier Garau<sup>4</sup> PhD, Alejandro Bustamante<sup>5</sup> PhD, Lalit Kalra<sup>6</sup> PhD, Peter Langhorne<sup>7</sup> PhD, Angel Chamorro<sup>8</sup> PhD, Xabier Urrea<sup>8</sup> PhD, Mira Katan<sup>9</sup> MD MSc, Mario Di Napoli<sup>10</sup> MD, Willeke Westendorp<sup>11</sup> MD, Paul J Nederkoorn<sup>11</sup> PhD, Diederik van de Beek<sup>11</sup> PhD, Christine Roffe<sup>12</sup> MD, Mark Woodhead<sup>13</sup> DM, Joan Montaner<sup>5,14</sup> PhD, Andreas Meisel<sup>15</sup> MD, Craig J Smith<sup>1,2</sup> MD

<sup>1</sup>Greater Manchester Comprehensive Stroke Centre, Manchester Academic Health Science Centre, Salford Royal Foundation Trust, UK; <sup>2</sup>Division of Cardiovascular Sciences, University of Manchester, Manchester, UK; <sup>3</sup>Centre for Biostatistics, University of Manchester, Salford Royal Foundation Trust, UK; <sup>4</sup>Department of Medicine, Hospital Universitari Mutua de Terrassa, Barcelona, Clinica Rotger Quironsalud, Palma of Mallorca, Spain; <sup>5</sup>Neurovascular Research Lab, Vall d'Hebron Research Institute, Barcelona, Spain, Spain; <sup>6</sup>Clinical Neurosciences, King's College Hospital NHS Foundation Trust London, UK; <sup>7</sup>Institute of Cardiovascular and Medical Sciences, University of Glasgow, Glasgow, UK; <sup>8</sup>Comprehensive Stroke Center, Department of Neuroscience, Hospital Clinic, University of Barcelona, Barcelona, Spain; <sup>9</sup>Department of Neurology, Stroke Center, University Hospital of Zurich, Zurich, Switzerland; <sup>10</sup>Stroke Unit, San Camillo de' Lellis General Hospital, Rieti, Italy; <sup>11</sup>Amsterdam UMC, University of Amsterdam, Department of Neurology, Amsterdam Neuroscience, Meibergdreef, Amsterdam, Netherlands; <sup>12</sup>Keele University Institute for Science and Technology in Medicine, Guy Hilton Research Centre, Stoke-on-Trent, UK;<sup>13</sup> Faculty of Biology, Medicine and Health, University of Manchester, Manchester Academic Health Science Centre, Manchester, UK; <sup>14</sup> Institute de Biomedicine of Seville, IBiS/Hospitales Universitarios Virgen del Rocío y Macarena, University of Seville, Seville, Spain; <sup>15</sup>NeuroCure Clinical Research Center, Center for Stroke Research Berlin, Department of Neurology, Charité Universitätsmedizin Berlin, Germany

Cover title: Antibiotic treatment for pneumonia complicating stroke

Corresponding author: Dr Amit K Kishore

Manchester Centre for Clinical Neurosciences, Salford Royal NHS Foundation Trust, Stott  
lane, Salford, M6 8HD, UK;

Tel: +44 161 206 4044

Fax: +44 161 707 6534

[Amit.Kishore@manchester.ac.uk](mailto:Amit.Kishore@manchester.ac.uk)

## Online Only Table I: Search terms

Subject Search in MESH: exp \*Cerebrovascular disorders/; exp \*Pneumonia/;exp\*antibiotic agent  
[Limit to: Publication Year 1946-2018]

Stroke\*,Pneumonia\*, “respiratory tract infection\*”,  
“chest infection\*”“antibiotic treatment\*”, antibiotic\*,  
“anti-infective agent\*”, “anti-microbial\*”, penicillin\*,  
Amoxicillin\*, cephalosporin\* , monobactam\*,  
carbapenem\*, macrolide\*, tetracycline\*,  
fluoroquinolone\*, Metronidazole\*, aminoglycoside\*,  
Doxycycline\*,Clarithromycin\*, Vancomycin\*,  
Levofloxacin\*, Ciprofloxacin\*,Linezolid\*  
[Limit to: Publication Year 1946-2018]

Subject Search on EMTREE: exp \*Cerebrovascular disease/ exp \*Pneumonia/; \* exp antiinfective agent  
[Limit to: Publication Year 1901-2018]

Stroke\*, Pneumonia\*, “respiratory tract infection\*”,  
“chest infection\*”, “antibiotic treatment\*”, antibiotic\*,  
“anti-infective agent\*”, “anti-microbial\*”, penicillin\*,  
Amoxicillin\*, cephalosporin\* , monobactam\*,  
carbapenem\*, macrolide\*, tetracycline\*,  
fluoroquinolone\*, Metronidazole\*, aminoglycoside\*,  
Doxycycline\*,Clarithromycin\*,  
Vancomycin\*Levofloxacin\*, Ciprofloxacin\*,  
Linezolid\*  
[Limit to: Publication Year 1901-2018]

[Limit to: Publication Year 1980-2016]

All text: “stroke” , “pneumonia” , “antibiotic treatment”

Publication Year from 1980 to 2018, in Cochrane Reviews (Protocols only), Trials and Methods Studies (Word variations have been searched)

## Online Only Table II: Eligibility criteria

---

### Inclusion criteria

---

Age  $\geq$  18years

Fully published studies or abstracts

English or non-English language

Inpatients with ischemic stroke, intracerebral haemorrhage, or both

Randomized and other controlled trials, including cluster RCTs, controlled (non-randomized) clinical trials (CCTs) or cluster trials, prospective comparative cohort studies, retrospective observational studies, case-control or nested case-control studies.

Incidence or prevalence of pneumonia following admission with stroke reported

Antibiotic s used to treat pneumonia complicating stroke identified and treatment outcomes measured

---

### Exclusion criteria

---

Age<18years

Exclusively intubated and mechanically ventilated patients

Exclusively pneumonia preceding index stroke

Case reports

---

**Online Only Table III:** Summary of consensus statements and process

|                                                                                                                                                                                     | Preliminary Consensus (%) | Final Consensus (%) |
|-------------------------------------------------------------------------------------------------------------------------------------------------------------------------------------|---------------------------|---------------------|
| <b>Is there a clinical need for an antibiotic treatment guideline specifically for pneumonia complicating stroke?</b>                                                               |                           |                     |
| Yes                                                                                                                                                                                 | 100                       | 100                 |
| No                                                                                                                                                                                  | 0                         | 0                   |
| <b>If yes, the antibiotic treatment guideline for pneumonia complicating stroke should be applied to which of the following?</b>                                                    |                           |                     |
| Pneumonia occurring as an inpatient at any time point after stroke                                                                                                                  | 27                        | 0                   |
| Pneumonia within 7 days after admission with stroke (Stroke associated pneumonia, SAP)                                                                                              | 87                        | 100                 |
| Pneumonia in patients with known or strongly suspected of aspiration (e.g. witnessed vomiting, nil-by-mouth)                                                                        | 40                        | 40                  |
| Recurrent pneumonia during admission ( e.g. in tube fed patients)                                                                                                                   | 7                         | 0                   |
| Patients developing pneumonia while mechanically ventilated                                                                                                                         | 7                         | 0                   |
| <b>Do you think the bacterial etiology of pneumonia complicating stroke has some overlap with (can choose more than 1):</b>                                                         |                           |                     |
| Hospital acquired pneumonia (HAP)                                                                                                                                                   | 87                        | 75                  |
| Community acquired pneumonia (CAP)                                                                                                                                                  | 67                        | 75                  |
| Ventilator-associated pneumonia (VAP)                                                                                                                                               | 53                        | 0                   |
| None of the above                                                                                                                                                                   | 0                         | 0                   |
| <b>Should empirical treatment of pneumonia complicating stroke cover (can choose more than one):</b>                                                                                |                           |                     |
| Gram positive cocci (e.g. <i>Staphylococcus aureus</i> , <i>Streptococcus pneumoniae</i> etc)?                                                                                      | 73                        | 75                  |
| Coliforms (e.g. <i>Escherichia coli</i> , <i>Klebsiella spp</i> )?                                                                                                                  | 60                        | 75                  |
| Pseudomonas species                                                                                                                                                                 | 7                         | 75                  |
| None of the above                                                                                                                                                                   | 0                         | 0                   |
| All of the above                                                                                                                                                                    | 34                        | 100                 |
| Other                                                                                                                                                                               | 27                        |                     |
| <b>Is there sufficient evidence to currently justify empirical recommendation of one particular antibiotic class (or dual therapy) over another for (can choose more than one):</b> |                           |                     |
| Pneumonia complicating stroke at any time after admission?                                                                                                                          | 20                        | 0                   |
| Stroke associated pneumonia                                                                                                                                                         | 27                        | 0                   |
| Pneumonia in patients with known or strongly suspected aspiration (e.g. witnessed vomiting, nil-by-mouth secondary to dysphagia)?                                                   | 20                        | 0                   |
| Recurrent pneumonia during admission after stroke?                                                                                                                                  | 0                         | 0                   |
| None of the above                                                                                                                                                                   | 67                        | 100                 |
| <b>Is a randomized trial comparing different empirical antibiotics for suspected or confirmed SAP justified?</b>                                                                    |                           |                     |
| Yes                                                                                                                                                                                 | 80                        | 100                 |
| No                                                                                                                                                                                  | 20                        | 0                   |



**Online only Table IV:** Excluded studies from systematic literature search

1. Vermeij JD, Westendorp WF, Dippel DWJ, van de Beek D, Nederkoorn PJ. Antibiotic therapy for preventing infections in people with acute stroke. *Cochrane Database of Syst Rev*. 2018. 1; 1:31. Art. No.: CD008530. DOI: 10.1002/14651858.CD008530.pub3
2. Badve MS, Zhou Z, Anderson CS, Hackett ML. Effectiveness and Safety of Antibiotics for Preventing Pneumonia and Improving Outcome after Acute Stroke: Systematic Review and Meta-analysis. *J Stroke Cerebrovasc Dis*. 2018;27:3137-3147.
3. Chamorro A, Horcajada JP, Obach V, Vargas M, Revilla M, Torres F, et al. The early systemic prophylaxis of infection after stroke study: a randomized clinical trial. *Stroke*. 2005;36:1495-1500.
4. Harms H, Prass K, Meisel C, Klehmet J, Rogge W, Drenckhahn C, et al. Preventive antibacterial therapy in acute ischemic stroke: a randomized controlled trial. *PLoS One*. 2008;3:e2158.
5. Kalra L, Irshad S, Hodsoll J, Simpson M, Gulliford M, Smithard D, et al; STROKE-INF Investigators. Prophylactic antibiotics after acute stroke for reducing pneumonia in patients with dysphagia (STROKE-INF): a prospective, cluster randomised, open-label, masked endpoint, controlled clinical trial. *Lancet*. 2015;386 :1835-44.
6. Schwarz S, Al-Shajlawi F, Sick C, Meairs S, Hennerici MG. Effects of prophylactic antibiotic therapy with mezlocillin plus sulbactam on the incidence and height of fever after severe acute ischemic stroke: the Mannheim infection in stroke study (MISS). *Stroke*. 2008;39:1220-1227.
7. Westendorp WF, Vermeij JD, Zock E, Hooijenga IJ, Kruijff ND, Bosboom HJ, et al; PASS Investigators. The Preventive Antibiotics in Stroke Study (PASS): a pragmatic randomised open-label masked endpoint clinical trial. *Lancet*. 2015;385:1519–1526.

8. Lampl Y, Boaz M, Gilad R, Lorberboym M, Dabby R, Rapoport A, et al. Minocycline treatment in acute stroke: an open-label, evaluator-blinded study. *Neurology*. 2007;69:1404-10.
9. De Falco FA, Santangelo R, Majello L, Angelone P. Antimicrobial prophylaxis in the management of ischemic stroke. *Rivista di Neurobiol*. 1998;44:63-67.
10. Harms H, Hoffmann S, Malzahn U, Ohlraun S, Heuschmann P, Meisel A. Decision-making in the diagnosis and treatment of stroke-associated pneumonia. *J Neurol Neurosurg Psychiatry*. 2012;83:1225-1230.
